# Supplementary material for: New Characteristics in the Fermentation Process of Cocoa (Theobroma cacao L.) “Super Árbol” in La Joya de los Sachas, Ecuador
Source: MDPI journal article supplement (doi:10.3390/su14137564), 2022-06-21
Supplement: s1 [file s1]

## Supplementary materials

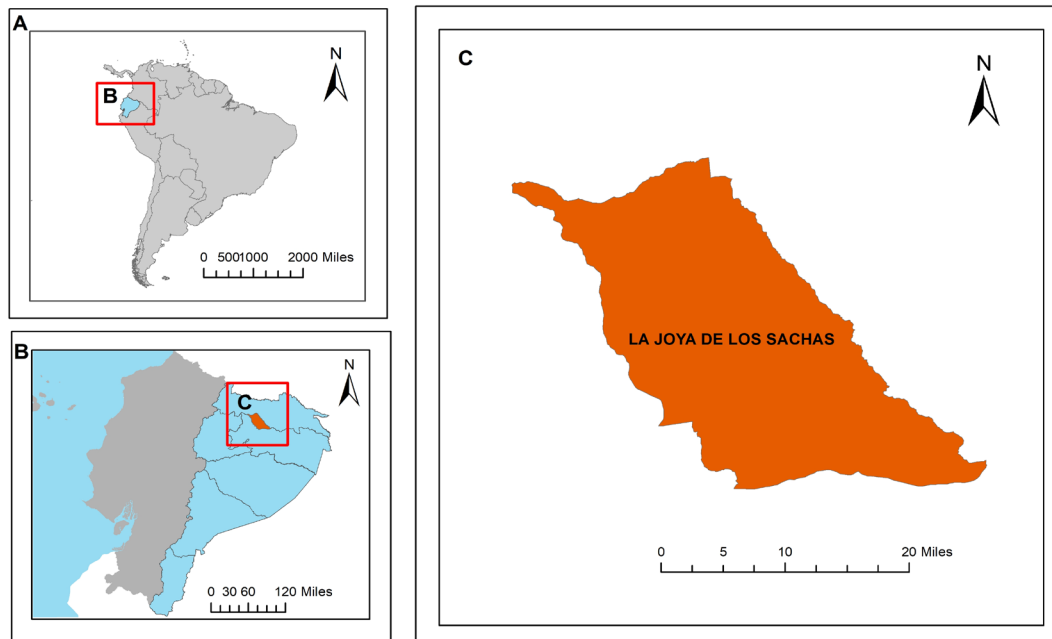

**Figure S1.** Study area; A) Ecuador; B) Orellana, La Joya de los Sachas; C) Planting areas.

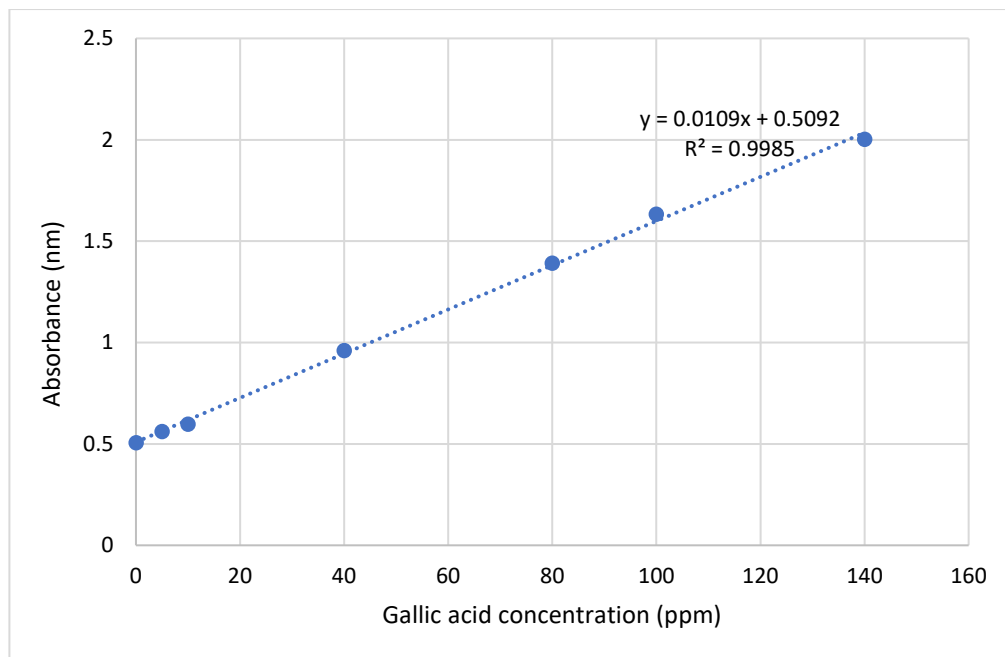

**Figure S2.** Calibration curve for total polyphenols.

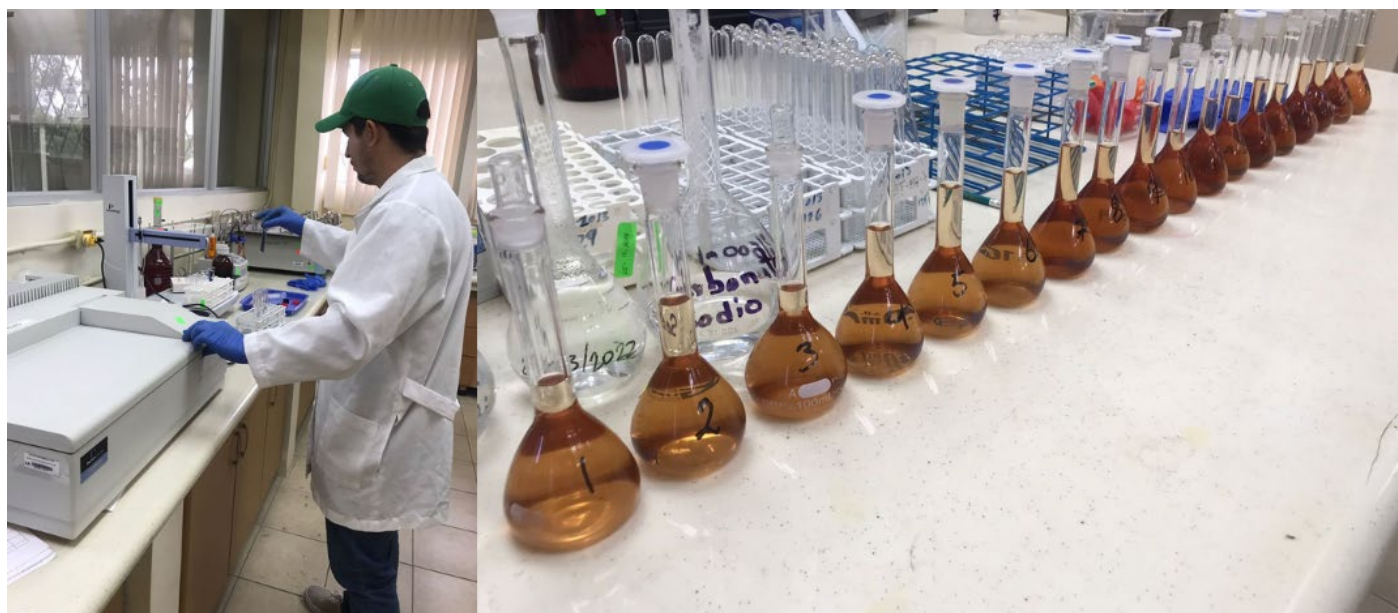

**Figure S3.** Total polyphenol analysis photograph.

**Table S1.** Effect of the treatments on the dependent variables analyzed.

| G           | F          | FM              | WB (g)      | FR (%)     | BS (% p/p) | pH         | A (% p/p) | P (% p/p)  | L (% p/p)  | TP (mgGAE/gDW) |
|-------------|------------|-----------------|-------------|------------|------------|------------|-----------|------------|------------|----------------|
| Arriba      | Jute sack  | Pre-drying      | 158.6 ± 4.8 | 85.7 ± 2.3 | 11.5 ± 0.5 | 5.6 ± 0.02 | 3.6 ± 0.1 | 12.5 ± 1.6 | 45.9 ± 0.7 | 58.2 ± 4.8     |
|             |            | Beans with pulp | 159.5 ± 4.4 | 64.0 ± 1.7 | 14.6 ± 0.5 | 4.9 ± 0.04 | 3.1 ± 0.1 | 12.3 ± 0.1 | 46.3 ± 1.9 | 79.2 ± 3.3     |
|             | Wooden box | Pre-drying      | 158.4 ± 6.8 | 85.3 ± 2.5 | 16.3 ± 1.1 | 5.0 ± 0.03 | 3.5 ± 0.1 | 13.1 ± 0.5 | 43.9 ± 3.4 | 57.8 ± 1.23    |
|             |            | Beans with pulp | 166.3 ± 2.9 | 63.0 ± 2.0 | 13.9 ± 0.8 | 5.1 ± 0.02 | 3.1 ± 0.1 | 12.2 ± 0.8 | 47.7 ± 4.6 | 57.2 ± 4.9     |
| Super árbol | Jute sack  | Pre-drying      | 145.8 ± 0.6 | 89.3 ± 2.5 | 13.3 ± 0.7 | 5.7 ± 0.11 | 3.9 ± 0.1 | 13.7 ± 0.4 | 43.8 ± 2.5 | 55.5 ± 3.2     |
|             |            | Beans with pulp | 130.7 ± 2.4 | 64.3 ± 0.6 | 18.1 ± 0.6 | 5.1 ± 0.00 | 3.3 ± 0.1 | 13.0 ± 0.5 | 45.2 ± 1.4 | 48.8 ± 2.7     |
|             | Wooden box | Pre-drying      | 146.3 ± 2.3 | 95.0 ± 1.7 | 13.4 ± 0.7 | 5.6 ± 0.06 | 4.0 ± 0.1 | 14.1 ± 0.5 | 43.9 ± 1.0 | 48.5 ± 1.6     |
|             |            | Beans with pulp | 125.5 ± 0.7 | 74.3 ± 2.9 | 17.8 ± 0.7 | 5.2 ± 0.05 | 3.3 ± 0.1 | 12.7 ± 1.  | 44.4 ± 0.9 | 55.3 ± 2.8     |

Results are expressed as mean ± standard deviation (SD) (n = 3).

Fermentation rate (FR); Weight of 100 beans (WB); pH cotyledon (pH); Beans shell (BS); Protein (P); Ash (A); Lipid (L); Total polyphenols (TP)
